# Supplementary material for: A MOF vertical array enables continuous ion transport pathways with high throughput
Source: Royal Society of Chemistry journal article supplement (doi:10.1039/d3ta01715j), 2023-01-01
Supplement: d3ta01715j1.pdf [file d3ta01715j1.pdf]

Supplementary Information for

**A MOF vertical array enables continuous ion transport pathways  
with high throughput**

Shuxian Wang,<sup>a,‡</sup> Zhongliang Li,<sup>a,‡</sup> Fangying Shen,<sup>a,‡</sup> Zhiqin Ruan, Yutong Huang,<sup>a</sup>  
Yang Liu,<sup>a</sup> Yan Liu,<sup>a</sup> Luyi Chen,<sup>a,\*</sup> Ya-Qian Lan,<sup>a,\*</sup> and Qifeng Zheng<sup>a,\*</sup>

<sup>a</sup> School of Chemistry, South China Normal University, 55 West Zhongsan Rd.,  
Guangzhou 510006, Guangdong, China.

*E-mail:* chenluyi@m.scnu.edu.cn; yqlan@m.scnu.edu.cn;  
qifeng.zheng@m.scnu.edu.cn

<sup>‡</sup> S. Wang, Z. Li, and F. Shen contributed equally to this work.

## Supplementary Experimental Section

### Materials

LiTFSI was kindly provided by Guangzhou Tinci Materials Technology Co. Ltd. Poly(vinylidene fluoride) (PVDF, Mw: 1,000,000 g mol<sup>-1</sup>) was purchased from Arkema. Polyethylene oxide (PEO, Mw: 600,000 g mol<sup>-1</sup>), Co(NO<sub>3</sub>)<sub>2</sub>·6H<sub>2</sub>O (99%) and 2-methylimidazole were purchased from Macklin. The separator with ceramic coating layer (MA-EN-SE-0D) was purchased from Guangdong Canrd New Energy Technology Co. Ltd.

### Synthesis of MOF particle

2.6 g of 2-methylimidazole and 1.17 g of Co(NO<sub>3</sub>)<sub>2</sub>·6H<sub>2</sub>O were first dissolved in two 80 mL of deionized water, respectively. After stirring vigorously for 5 min, the above two solutions were mixed quickly and allowed to react for 5 h. Then, the purple powder was obtained by centrifugation with a speed of 10,000 r min<sup>-1</sup> for 5 min and washed with methanol three times. Finally, the MOF particle was obtained after activation in a vacuum oven at 150 °C for 24 h.

### Fabrication of MOF particle CSE

First, 0.042 g MOF powder, 0.1 g PVDF, and 0.1 g LiTFSI were added into 1 ml NMP solvent and stirred for 6 h at 50 °C. Then, the above solution was bladed on a clean and smooth glass plate using a 250 μm doctor blade, which was further vacuum dried at 80 °C for 24 h, denoted as PVDF/MOF particle layer. In another solution, 0.01 g MOF powder were added into 1 ml PEO/LiTFSI solution (the molar ratio of [EO]: LiTFSI was 16:1) and stirred for 6 h, which was then coated on the surface of

PVDF/MOF particle layer. The film was then under vacuum dried at 80 °C for 24 h to obtain PVDF/MOF particle/PEO CSE, denoted as MOF particle CSE. Finally, the film was cut into circular disc with a diameter of 19 mm and stored in a glove box prior to use.

### **Material characterization**

The X-ray powder diffraction patterns were characterized using a diffractometer (D8 Advance, Bruker) with Cu K $\alpha$  radiation. The morphology investigation was performed using a scanning electron microscope (SEM, MAIA3, TESCAN Brno, s.r.o.). Thermogravimetric analysis (TGA) was tested from 30 to 800 °C at 10 °C min<sup>-1</sup> under Ar atmosphere.

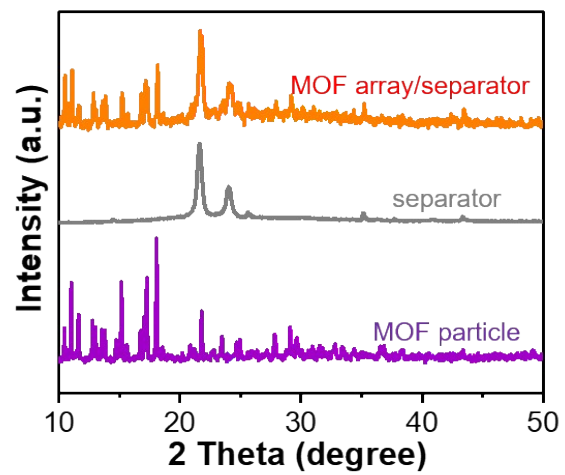

**Fig. S1.** XRD pattern of MOF particle, separator, and MOF array/separator.

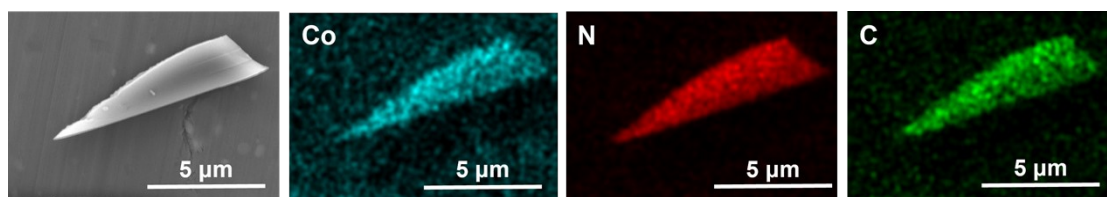

**Fig. S2.** SEM image and corresponding EDS element mapping images of the MOF particle.

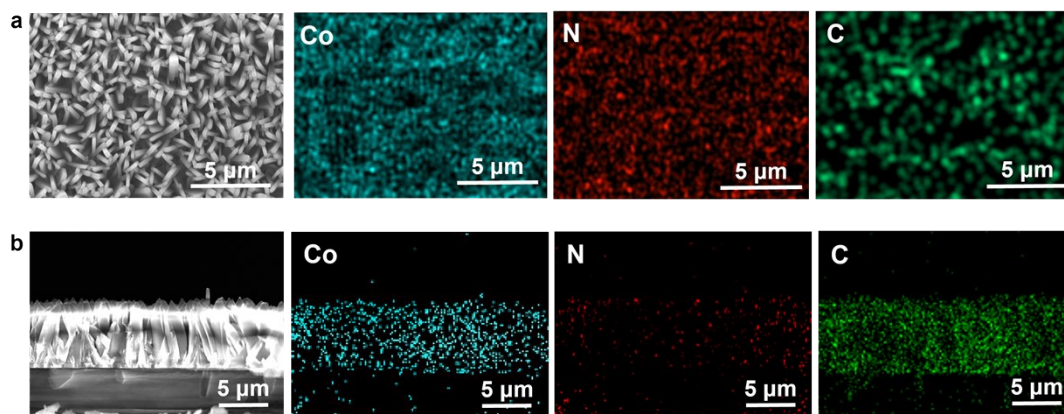

**Fig. S3.** (a) Top view and (b) cross-sectional view of SEM images and corresponding EDS element mapping images of MOF array.

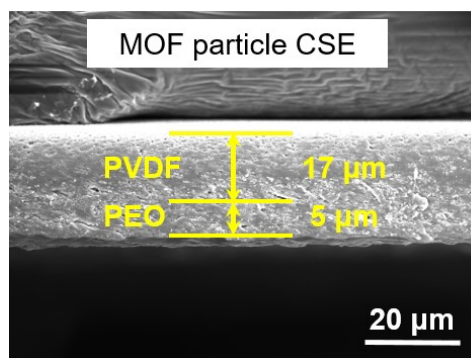

**Fig. S4.** Cross-sectional SEM image of MOF particle CSE.

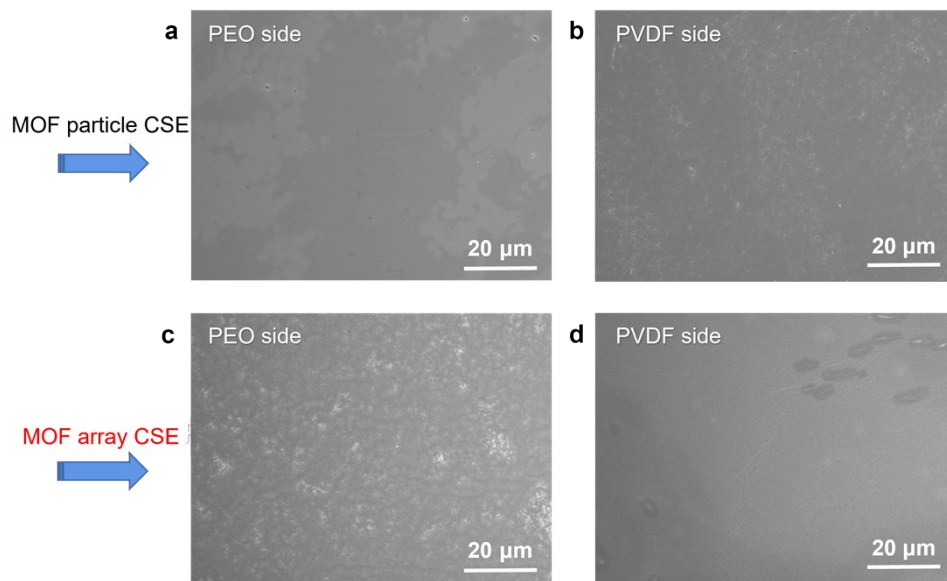

**Fig. S5.** The top view SEM images of (a, b) MOF particle CSE and (c, d) MOF array CSE.



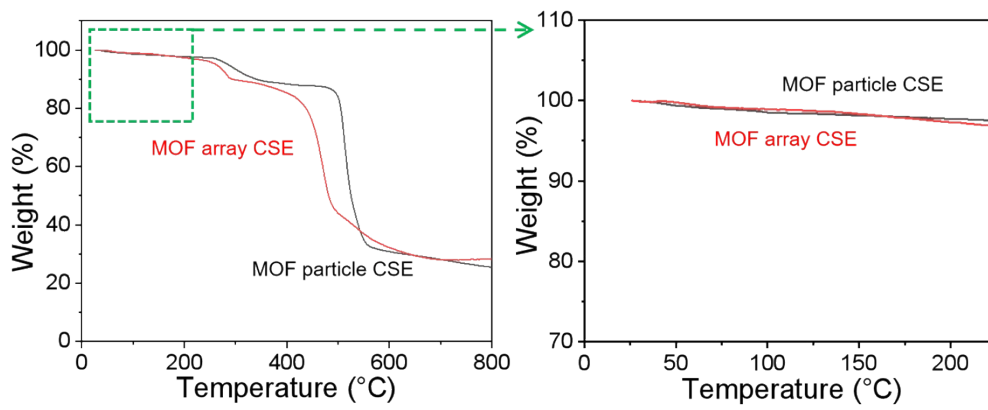

**Fig. S6.** TGA curves of the MOF array CSE and MOF particle CSE.

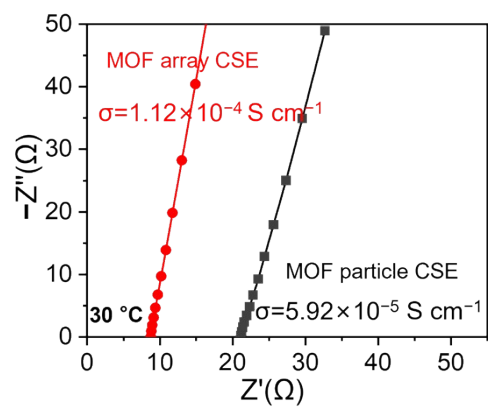

**Fig. S7.** Ionic conductivities of MOF array CSE and MOF particle CSE at 30 °C.

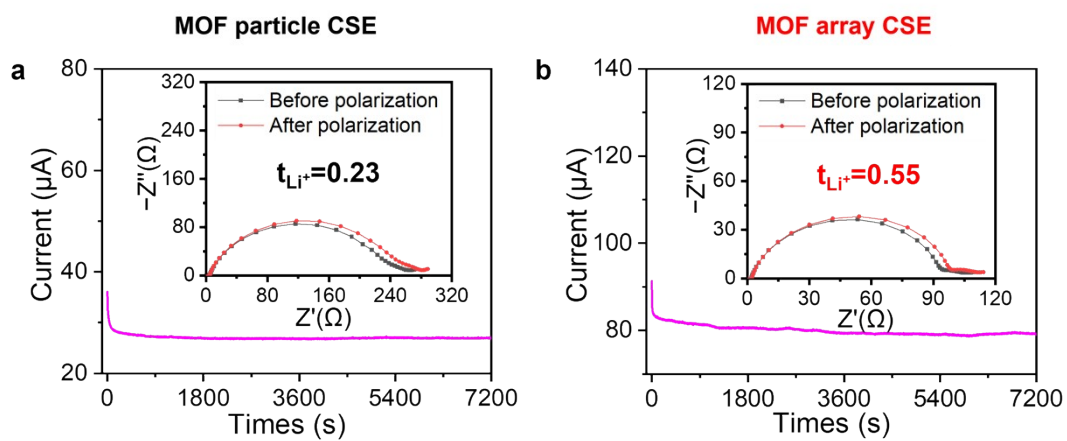

**Fig. S8.**  $\text{Li}^+$  transference number of (a) MOF particle CSE and (b) MOF array CSE at

30

$^{\circ}\text{C}$ .

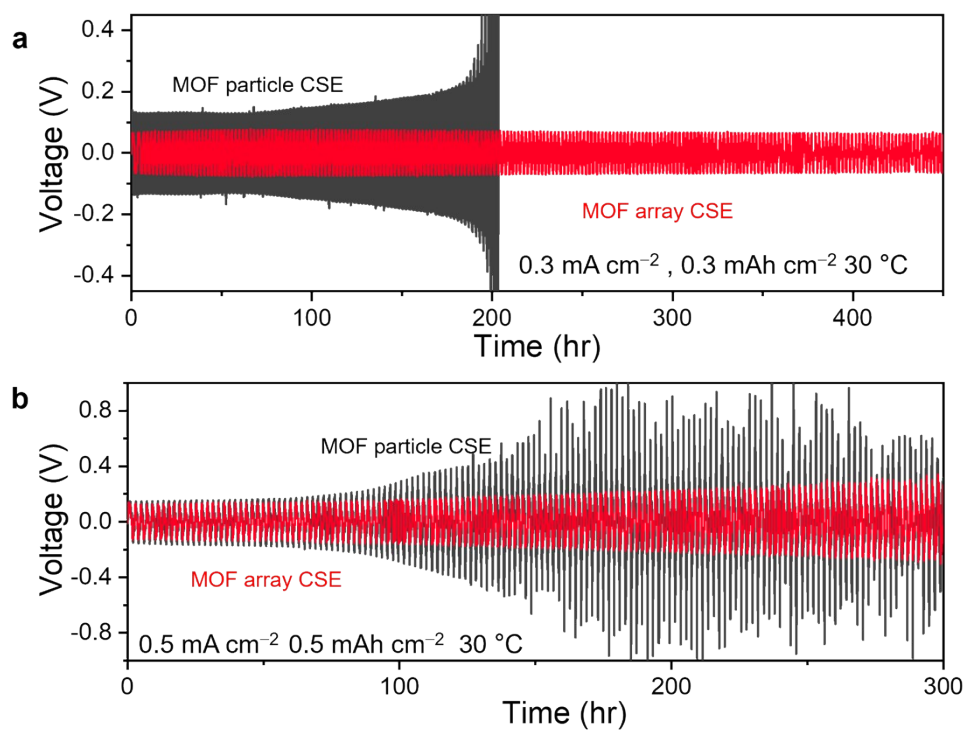

**Fig. S9.** Long-term cycling stability of symmetric Li||Li cells using MOF particle CSE and MOF array CSE at current density of (a)  $0.3 \text{ mA cm}^{-2}$  for  $0.3 \text{ mA h cm}^{-2}$  and (b)  $0.5 \text{ mA cm}^{-2}$  for  $0.5 \text{ mA h cm}^{-2}$  at  $30 \text{ }^\circ\text{C}$ .

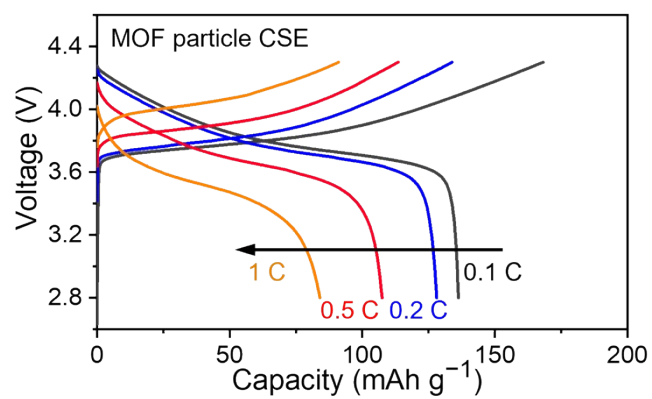

**Fig. S10.** Selected charge-discharge curves of Li||NCM cell using MOF particle CSE at different current densities.

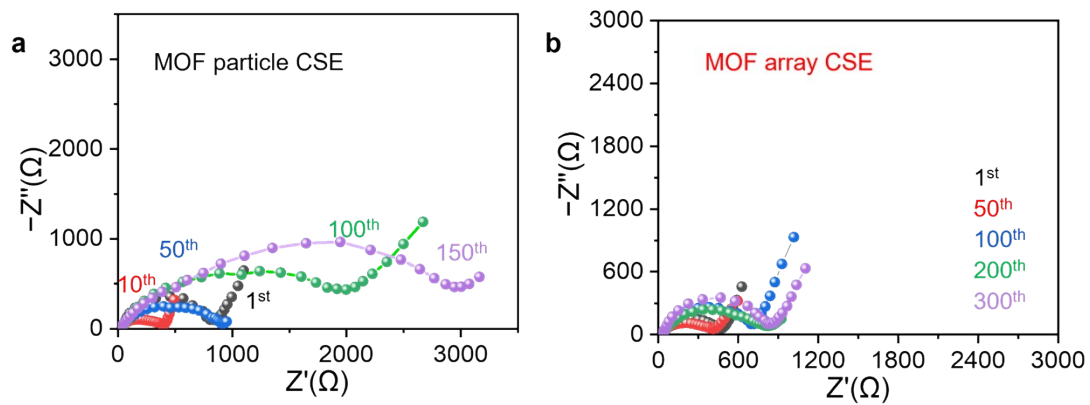

**Fig. S11.** Electrochemical impedance spectra of Li||NCM cells using (a) MOF particle CSE and (b) MOF array CSE after different cycles at 30 °C.

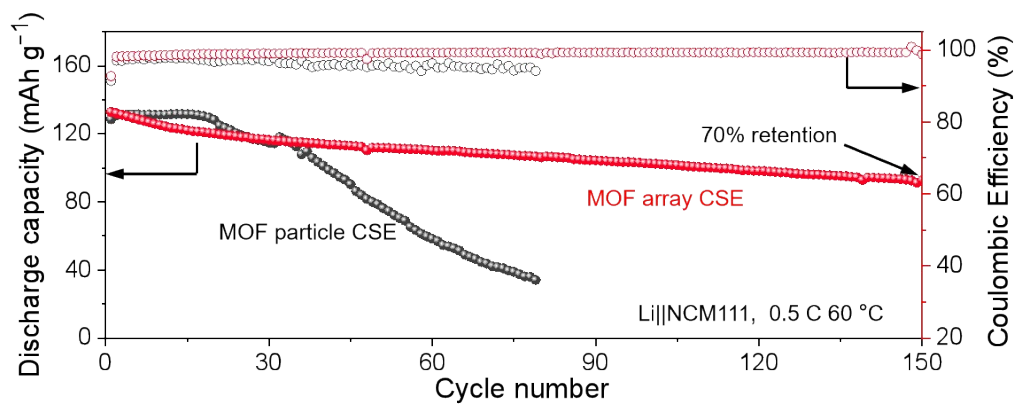

**Fig. S12.** Cycling performance of Li||NCM cells using MOF particle CSE and MOF array CSE at 0.5 C at 60 °C.

**Table S1.** Comparison of this work with state-of-the-art reported MOF-based CSEs without any liquid.

| CSE              | $\sigma$ (S cm <sup>-1</sup> )   | Thickness ( $\mu$ m) | $t_{\text{Li}^+}$ | Cathode material    | Cycling condition           | Cut-off voltage (V) | Capacity retention (%) | Ref. |
|------------------|----------------------------------|----------------------|-------------------|---------------------|-----------------------------|---------------------|------------------------|------|
| PEO-LiTFSI/ZIF-8 | $2.20 \times 10^{-5}$<br>(30 °C) | ~100                 | 0.36              | LiFePO <sub>4</sub> | 350 cycles<br>0.5 C, 60 °C  | 3.80                | 85.0 %                 | [1]  |
| UiO-66-LiSS      | $6.00 \times 10^{-5}$<br>(25 °C) | ~198                 | /                 | LiFePO <sub>4</sub> | 100 cycles<br>0.2 C, 25 °C  | 4.20                | 88.1 %                 | [2]  |
| MGPL-12          | $1.51 \times 10^{-3}$<br>(25 °C) | ~80                  | 0.64              | LiFePO <sub>4</sub> | 50 cycles<br>0.2 C, 25 °C   | 4.30                | 96.4 %                 | [3]  |
| NCPE             | $1.66 \times 10^{-5}$<br>(25 °C) | ~130                 | 0.378             | LiFePO <sub>4</sub> | 50 cycles,<br>0.1 C, 30 °C  | 4.00                | 100.0 %                | [4]  |
| NWF@Cu(BDC)-PVDF | $2.40 \times 10^{-4}$<br>(30 °C) | ~40                  | 0.61              | NCM811              | 80 cycles,<br>0.1 C, 30 °C  | -                   | 95.0 %                 | [5]  |
| HKUST@PI/PVDF    | $2.38 \times 10^{-4}$<br>(30 °C) | ~25                  | 0.56              | NCM111              | 500 cycles,<br>0.2 C, 30 °C | 4.30                | 86.0 %                 | [6]  |
| M-S-PEGDA        | $2.26 \times 10^{-4}$<br>(30 °C) | -                    | 0.44              | NCM811              | 100 cycles,<br>0.5 C, 30 °C | 4.25                | 92.7 %                 | [7]  |



|                             |                                                           |            |             |                     |                                          |             |             |                  |
|-----------------------------|-----------------------------------------------------------|------------|-------------|---------------------|------------------------------------------|-------------|-------------|------------------|
| The cross-linked MOF chains | $7.78 \times 10^{-4}$<br>(25 °C)                          | ~88        | 0.88        | LiFePO <sub>4</sub> | 600 cycles,<br>3 C, 30 °C                | 4.00        | 99.8 %      | [8]              |
| 30 H-Z-CPE                  | $1.41 \times 10^{-4}$<br>(25 °C)                          | ~42        | 0.41        | NCM811              | 100 cycles,<br>0.1 C, 60 °C              | 4.30        | 73.0 %      | [9]              |
| <b>MOF array CSE</b>        | <b><math>1.12 \times 10^{-4}</math></b><br><b>(30 °C)</b> | <b>~20</b> | <b>0.55</b> | <b>NCM111</b>       | <b>300 cycles</b><br><b>0.2 C, 30 °C</b> | <b>4.30</b> | <b>75 %</b> | <b>This work</b> |

## Reference

1. Z. Lei, J. Shen, W. Zhang, Q. Wang, J. Wang, Y. Deng and C. Wang, *Nano Res.*, 2020, **13**, 2259–2267.
2. H. Yang, B. Liu, J. Bright, S. Kasani, J. Yang, X. Zhang and N. Wu, *ACS Appl. Energy Mater.*, 2020, **3**, 4007-4013.
3. X. Lu, H. Wu, D. Kong, X. Li, L. Shen and Y. Lu, *ACS Materials Lett.*, 2020, **2**, 1435-1441.
4. Q. Han, S. Wang, Z. Jiang, X. Hu and H. Wang, *ACS Appl. Mater. Interfaces*, 2020, **12**, 20514-20521.
5. J. Yu, T. Guo, C. Wang, Z. Shen, X. Dong, S. Li, H. Zhang and Z. Lu, *Nano Lett.*, 2021, **21**, 5805-5812.
6. S. Zheng, Z. Li, L. Chen, Y. Huang, J. Shi, S. Wang, Y. Liu, Y. Liu, Y.-P. Cai and Q. Zheng, *ACS Mater. Lett.*, 2023, **5**, 1136-1144.
7. H. Wang, Q. Wang, X. Cao, Y. He, K. Wu, J. Yang, H. Zhou, W. Liu and X. Sun, *Adv. Mater.*, 2020, **32**, 2001259.
8. Q. Zeng, J. Wang, X. Li, Y. Ouyang, W. He, D. Li, S. Guo, Y. Xiao, H. Deng, W. Gong, Q. Zhang and S. Huang, *ACS Energy Lett.*, 2021, **6**, 2434-2441.
9. Y. Hu, T. Feng, L. Xu, L. Zhang and L. Luo, *Batteries & Supercaps*, 2022, **5**, e202100303.
